# Supplementary material for: Prevalence of, and factors associated with health supplement use in Dubai, United Arab Emirates: a population-based cross-sectional study
Source: Springer Nature journal article supplement (doi:10.1186/s12906-019-2593-6), 2019-07-12
Supplement: MOESM1 [file 16924830]

## Health Supplement Use in Dubai Telephone Questionnaire

| Section A- Demographic Data      |                                                                                                 |                                           |                                          |                                       |
|----------------------------------|-------------------------------------------------------------------------------------------------|-------------------------------------------|------------------------------------------|---------------------------------------|
| <b>Age</b><br>(years/months)     |                                                                                                 |                                           |                                          |                                       |
| <b>Gender</b>                    | Male <input type="checkbox"/>                                                                   |                                           | Female <input type="checkbox"/>          |                                       |
| <b>Marital Status</b>            | Married <input type="checkbox"/>                                                                | Single <input type="checkbox"/>           | Divorced <input type="checkbox"/>        | Widowed <input type="checkbox"/>      |
| <b>Nationality</b>               | UAE National <input type="checkbox"/> Non-UAE National <input type="checkbox"/> (Specify .....) |                                           |                                          |                                       |
| <b>Occupation</b>                | Student <input type="checkbox"/>                                                                | Employed <input type="checkbox"/>         | Unemployed <input type="checkbox"/>      | Retired <input type="checkbox"/>      |
| <b>Health Insurance Coverage</b> | Yes <input type="checkbox"/>                                                                    |                                           | No <input type="checkbox"/>              |                                       |
| <b>Income</b>                    | <5000 AED <input type="checkbox"/>                                                              | 5000- <10000 AED <input type="checkbox"/> | 10000-20000 AED <input type="checkbox"/> | >20000AED <input type="checkbox"/>    |
| <b>Education</b>                 | Less than High School <input type="checkbox"/>                                                  | High School <input type="checkbox"/>      | Graduate <input type="checkbox"/>        | Postgraduate <input type="checkbox"/> |
| <b>Weight (kg)</b>               |                                                                                                 |                                           |                                          |                                       |
| <b>Height (cm)</b>               |                                                                                                 |                                           |                                          |                                       |

| Section B- Health and Lifestyle |                                                                                                                                                                                                                                                                                                                                                                                                                                                                                                                                                                                                                                                                                                                                                                                                                                                                                                                                                                                                                                                                                                                                                                                                                                                                                                                      |                              |                             |                              |         |       |               |                             |                              |         |       |                                 |                             |                              |         |       |          |                             |                              |         |       |                        |                             |                              |         |       |        |                             |                              |         |       |       |                             |                              |         |       |
|---------------------------------|----------------------------------------------------------------------------------------------------------------------------------------------------------------------------------------------------------------------------------------------------------------------------------------------------------------------------------------------------------------------------------------------------------------------------------------------------------------------------------------------------------------------------------------------------------------------------------------------------------------------------------------------------------------------------------------------------------------------------------------------------------------------------------------------------------------------------------------------------------------------------------------------------------------------------------------------------------------------------------------------------------------------------------------------------------------------------------------------------------------------------------------------------------------------------------------------------------------------------------------------------------------------------------------------------------------------|------------------------------|-----------------------------|------------------------------|---------|-------|---------------|-----------------------------|------------------------------|---------|-------|---------------------------------|-----------------------------|------------------------------|---------|-------|----------|-----------------------------|------------------------------|---------|-------|------------------------|-----------------------------|------------------------------|---------|-------|--------|-----------------------------|------------------------------|---------|-------|-------|-----------------------------|------------------------------|---------|-------|
| <b>1</b>                        | <p><b>Do you have any allergy?</b><br/>                     Yes <input type="checkbox"/> (if yes, please choose from below options)      No <input type="checkbox"/>      Don't know <input type="checkbox"/></p> <p style="margin-left: 20px;">                         Food <input type="checkbox"/>    Drug <input type="checkbox"/>    Aerosol <input type="checkbox"/>    Contact <input type="checkbox"/>    Other <input type="checkbox"/><br/>                         Specify _____                     </p>                                                                                                                                                                                                                                                                                                                                                                                                                                                                                                                                                                                                                                                                                                                                                                                                |                              |                             |                              |         |       |               |                             |                              |         |       |                                 |                             |                              |         |       |          |                             |                              |         |       |                        |                             |                              |         |       |        |                             |                              |         |       |       |                             |                              |         |       |
| <b>2</b>                        | <p><b>How frequently have you visited a doctor in the past 12 months?</b></p> <p style="margin-left: 20px;">                         At least once a week <input type="checkbox"/>    1-3 times a month <input type="checkbox"/>    Less than monthly <input type="checkbox"/>    Never <input type="checkbox"/> </p>                                                                                                                                                                                                                                                                                                                                                                                                                                                                                                                                                                                                                                                                                                                                                                                                                                                                                                                                                                                                |                              |                             |                              |         |       |               |                             |                              |         |       |                                 |                             |                              |         |       |          |                             |                              |         |       |                        |                             |                              |         |       |        |                             |                              |         |       |       |                             |                              |         |       |
| <b>3</b>                        | <p><b>Have you ever been diagnosed with any chronic medical condition? (you can choose more than one answer)</b></p> <table style="width: 100%; border: none;"> <tr> <td style="width: 40%;">Respiratory disease</td> <td style="width: 10%;">No <input type="checkbox"/></td> <td style="width: 10%;">Yes <input type="checkbox"/></td> <td style="width: 10%;">Specify</td> <td style="width: 10%;">(...)</td> </tr> <tr> <td>Skin disorder</td> <td>No <input type="checkbox"/></td> <td>Yes <input type="checkbox"/></td> <td>Specify</td> <td>(...)</td> </tr> <tr> <td>Disease of the digestive system</td> <td>No <input type="checkbox"/></td> <td>Yes <input type="checkbox"/></td> <td>Specify</td> <td>(...)</td> </tr> <tr> <td>Diabetes</td> <td>No <input type="checkbox"/></td> <td>Yes <input type="checkbox"/></td> <td>Specify</td> <td>(...)</td> </tr> <tr> <td>Cardiovascular disease</td> <td>No <input type="checkbox"/></td> <td>Yes <input type="checkbox"/></td> <td>Specify</td> <td>(...)</td> </tr> <tr> <td>Cancer</td> <td>No <input type="checkbox"/></td> <td>Yes <input type="checkbox"/></td> <td>Specify</td> <td>(...)</td> </tr> <tr> <td>Other</td> <td>No <input type="checkbox"/></td> <td>Yes <input type="checkbox"/></td> <td>Specify</td> <td>(...)</td> </tr> </table> | Respiratory disease          | No <input type="checkbox"/> | Yes <input type="checkbox"/> | Specify | (...) | Skin disorder | No <input type="checkbox"/> | Yes <input type="checkbox"/> | Specify | (...) | Disease of the digestive system | No <input type="checkbox"/> | Yes <input type="checkbox"/> | Specify | (...) | Diabetes | No <input type="checkbox"/> | Yes <input type="checkbox"/> | Specify | (...) | Cardiovascular disease | No <input type="checkbox"/> | Yes <input type="checkbox"/> | Specify | (...) | Cancer | No <input type="checkbox"/> | Yes <input type="checkbox"/> | Specify | (...) | Other | No <input type="checkbox"/> | Yes <input type="checkbox"/> | Specify | (...) |
| Respiratory disease             | No <input type="checkbox"/>                                                                                                                                                                                                                                                                                                                                                                                                                                                                                                                                                                                                                                                                                                                                                                                                                                                                                                                                                                                                                                                                                                                                                                                                                                                                                          | Yes <input type="checkbox"/> | Specify                     | (...)                        |         |       |               |                             |                              |         |       |                                 |                             |                              |         |       |          |                             |                              |         |       |                        |                             |                              |         |       |        |                             |                              |         |       |       |                             |                              |         |       |
| Skin disorder                   | No <input type="checkbox"/>                                                                                                                                                                                                                                                                                                                                                                                                                                                                                                                                                                                                                                                                                                                                                                                                                                                                                                                                                                                                                                                                                                                                                                                                                                                                                          | Yes <input type="checkbox"/> | Specify                     | (...)                        |         |       |               |                             |                              |         |       |                                 |                             |                              |         |       |          |                             |                              |         |       |                        |                             |                              |         |       |        |                             |                              |         |       |       |                             |                              |         |       |
| Disease of the digestive system | No <input type="checkbox"/>                                                                                                                                                                                                                                                                                                                                                                                                                                                                                                                                                                                                                                                                                                                                                                                                                                                                                                                                                                                                                                                                                                                                                                                                                                                                                          | Yes <input type="checkbox"/> | Specify                     | (...)                        |         |       |               |                             |                              |         |       |                                 |                             |                              |         |       |          |                             |                              |         |       |                        |                             |                              |         |       |        |                             |                              |         |       |       |                             |                              |         |       |
| Diabetes                        | No <input type="checkbox"/>                                                                                                                                                                                                                                                                                                                                                                                                                                                                                                                                                                                                                                                                                                                                                                                                                                                                                                                                                                                                                                                                                                                                                                                                                                                                                          | Yes <input type="checkbox"/> | Specify                     | (...)                        |         |       |               |                             |                              |         |       |                                 |                             |                              |         |       |          |                             |                              |         |       |                        |                             |                              |         |       |        |                             |                              |         |       |       |                             |                              |         |       |
| Cardiovascular disease          | No <input type="checkbox"/>                                                                                                                                                                                                                                                                                                                                                                                                                                                                                                                                                                                                                                                                                                                                                                                                                                                                                                                                                                                                                                                                                                                                                                                                                                                                                          | Yes <input type="checkbox"/> | Specify                     | (...)                        |         |       |               |                             |                              |         |       |                                 |                             |                              |         |       |          |                             |                              |         |       |                        |                             |                              |         |       |        |                             |                              |         |       |       |                             |                              |         |       |
| Cancer                          | No <input type="checkbox"/>                                                                                                                                                                                                                                                                                                                                                                                                                                                                                                                                                                                                                                                                                                                                                                                                                                                                                                                                                                                                                                                                                                                                                                                                                                                                                          | Yes <input type="checkbox"/> | Specify                     | (...)                        |         |       |               |                             |                              |         |       |                                 |                             |                              |         |       |          |                             |                              |         |       |                        |                             |                              |         |       |        |                             |                              |         |       |       |                             |                              |         |       |
| Other                           | No <input type="checkbox"/>                                                                                                                                                                                                                                                                                                                                                                                                                                                                                                                                                                                                                                                                                                                                                                                                                                                                                                                                                                                                                                                                                                                                                                                                                                                                                          | Yes <input type="checkbox"/> | Specify                     | (...)                        |         |       |               |                             |                              |         |       |                                 |                             |                              |         |       |          |                             |                              |         |       |                        |                             |                              |         |       |        |                             |                              |         |       |       |                             |                              |         |       |
| <b>4</b>                        | <p><b>Have you taken prescription drugs in the past month?</b><br/>                     Yes <input type="checkbox"/> Specify (.....)      No <input type="checkbox"/>      Don't know <input type="checkbox"/></p>                                                                                                                                                                                                                                                                                                                                                                                                                                                                                                                                                                                                                                                                                                                                                                                                                                                                                                                                                                                                                                                                                                   |                              |                             |                              |         |       |               |                             |                              |         |       |                                 |                             |                              |         |       |          |                             |                              |         |       |                        |                             |                              |         |       |        |                             |                              |         |       |       |                             |                              |         |       |
| <b>5</b>                        | <p><b>Do you smoke?</b><br/>                     Every day <input type="checkbox"/>    Occasionally <input type="checkbox"/>    In the past <input type="checkbox"/>    Never <input type="checkbox"/></p>                                                                                                                                                                                                                                                                                                                                                                                                                                                                                                                                                                                                                                                                                                                                                                                                                                                                                                                                                                                                                                                                                                           |                              |                             |                              |         |       |               |                             |                              |         |       |                                 |                             |                              |         |       |          |                             |                              |         |       |                        |                             |                              |         |       |        |                             |                              |         |       |       |                             |                              |         |       |

| <b>Section C- Health Supplements Consumption</b> |                                                                                                                                                                                                                                                                                                                                                                                                                                                                                                                                                                                                                                                                                                                      |
|--------------------------------------------------|----------------------------------------------------------------------------------------------------------------------------------------------------------------------------------------------------------------------------------------------------------------------------------------------------------------------------------------------------------------------------------------------------------------------------------------------------------------------------------------------------------------------------------------------------------------------------------------------------------------------------------------------------------------------------------------------------------------------|
| <b>1</b>                                         | <b>Do you know what health supplements are?</b><br>Yes <input type="checkbox"/> No <input type="checkbox"/>                                                                                                                                                                                                                                                                                                                                                                                                                                                                                                                                                                                                          |
| <b>2</b>                                         | <b>Have you ever used health supplement?</b> (if your answer is "Currently", please proceed to question C4, if your answer is "Never", please proceed to the last question of the questionnaire)<br>Currently <input type="checkbox"/> In the past <input type="checkbox"/> Never <input type="checkbox"/>                                                                                                                                                                                                                                                                                                                                                                                                           |
| <b>3</b>                                         | <b>Why did you discontinue using any health supplements?</b> (you can choose more than one answer)<br>Allergic reactions <input type="checkbox"/> Serious skin disorders <input type="checkbox"/> Cost <input type="checkbox"/> Others <input type="checkbox"/> Specify (...)<br><input type="checkbox"/>                                                                                                                                                                                                                                                                                                                                                                                                            |
| <b>4</b>                                         | <b>For how long have you been using / had you used health supplement?</b><br>Less than a month <input type="checkbox"/> More than a month but less than a year <input type="checkbox"/> 1-5 years <input type="checkbox"/> > 5 years <input type="checkbox"/> Don't know <input type="checkbox"/>                                                                                                                                                                                                                                                                                                                                                                                                                    |
| <b>5</b>                                         | <b>How frequently do/did you use health supplement?</b><br>Daily or almost daily <input type="checkbox"/> 1-4 times a week <input type="checkbox"/> 1-3 times a month <input type="checkbox"/> Rarer than monthly through the year <input type="checkbox"/> Seasonally <input type="checkbox"/> Don't know <input type="checkbox"/>                                                                                                                                                                                                                                                                                                                                                                                  |
| <b>6</b>                                         | <b>Which categories of health supplements do /did you use?</b> (you can choose more than one answer)<br>Vitamins <input type="checkbox"/> Minerals <input type="checkbox"/> Herbal <input type="checkbox"/> Sports nutrition <input type="checkbox"/> Energy drink <input type="checkbox"/> Dietetic food <input type="checkbox"/> Others <input type="checkbox"/> Specify (.....)                                                                                                                                                                                                                                                                                                                                   |
| <b>7</b>                                         | <b>What is the form of the used product(s)?</b> (you can choose more than one answer)<br>Tablet <input type="checkbox"/> Capsule <input type="checkbox"/> Wafers <input type="checkbox"/> Powder <input type="checkbox"/> Gel <input type="checkbox"/> Chews/Gummy <input type="checkbox"/> Drops <input type="checkbox"/> Caplet <input type="checkbox"/> Chewable tablets <input type="checkbox"/><br>Granules <input type="checkbox"/> Drink <input type="checkbox"/> Spray <input type="checkbox"/> Lozenges <input type="checkbox"/> Soft gels <input type="checkbox"/> Vegicaps <input type="checkbox"/> Gel caps <input type="checkbox"/> Liquid <input type="checkbox"/> Don't know <input type="checkbox"/> |

|                                          |                                                                                             |                                      |                          |                                    |                          |
|------------------------------------------|---------------------------------------------------------------------------------------------|--------------------------------------|--------------------------|------------------------------------|--------------------------|
| <b>8</b>                                 | Which health supplement ingredient(s) do/did you use? (you can choose more than one answer) |                                      |                          |                                    |                          |
| Alfalfa                                  | <input type="checkbox"/>                                                                    | Amino Acids                          | <input type="checkbox"/> | Bee Pollen                         | <input type="checkbox"/> |
| Bilberry/Eyebright<br>Combination        | <input type="checkbox"/>                                                                    | Caffeine,<br>Multicomponent          | <input type="checkbox"/> | Calcium                            | <input type="checkbox"/> |
| Calcium & Magnesium                      | <input type="checkbox"/>                                                                    | Calcium & Vitamin<br>Chromium        | <input type="checkbox"/> | Cayenne Pepper                     | <input type="checkbox"/> |
| Chondroitin                              | <input type="checkbox"/>                                                                    | (Chromium<br>Picolinate)             | <input type="checkbox"/> | Cimicifuga<br>Racemosa             | <input type="checkbox"/> |
| Conjugated Linolenic<br>Acid             | <input type="checkbox"/>                                                                    | Creatine                             | <input type="checkbox"/> | Damiana Folia                      | <input type="checkbox"/> |
| Don't Know                               | <input type="checkbox"/>                                                                    | Echinacea                            | <input type="checkbox"/> | Ephedra                            | <input type="checkbox"/> |
| Fish Oils                                | <input type="checkbox"/>                                                                    | Folate (Folic Acid)                  | <input type="checkbox"/> | Fructus Cynosbati                  | <input type="checkbox"/> |
| Garlic                                   | <input type="checkbox"/>                                                                    | Gentian, Multi-<br>Component         | <input type="checkbox"/> | Ginger                             | <input type="checkbox"/> |
| Ginkgo Biloba                            | <input type="checkbox"/>                                                                    | Glandular Extract,<br>Multicomponent | <input type="checkbox"/> | Glucosamine                        | <input type="checkbox"/> |
| Grape Seed Extract                       | <input type="checkbox"/>                                                                    | Guarana                              | <input type="checkbox"/> | Herbal Caffeine,<br>Alone          | <input type="checkbox"/> |
| Iron (Ferrous Xxate)                     | <input type="checkbox"/>                                                                    | Kelp                                 | <input type="checkbox"/> | L-Carnitine                        | <input type="checkbox"/> |
| L-Cysteine                               | <input type="checkbox"/>                                                                    | Lecithin                             | <input type="checkbox"/> | Licorice                           | <input type="checkbox"/> |
| L-Methionine                             | <input type="checkbox"/>                                                                    | Lutein                               | <input type="checkbox"/> | Lycopene                           | <input type="checkbox"/> |
| Lysine                                   | <input type="checkbox"/>                                                                    | Magnesium                            | <input type="checkbox"/> | Melatonin                          | <input type="checkbox"/> |
| Methylsulfonyl Methane                   | <input type="checkbox"/>                                                                    | Morinda Citrifolia<br>(Noni)         | <input type="checkbox"/> | Oxymatrine                         | <input type="checkbox"/> |
| Panax Ginseng                            | <input type="checkbox"/>                                                                    | Parsley                              | <input type="checkbox"/> | Potassium                          | <input type="checkbox"/> |
| Pygeum Africanum                         | <input type="checkbox"/>                                                                    | Royal Jelly                          | <input type="checkbox"/> | Saw Palmetto                       | <input type="checkbox"/> |
| Saw Palmetto (Topical)                   | <input type="checkbox"/>                                                                    | Selenium                             | <input type="checkbox"/> | Siberian Ginseng                   | <input type="checkbox"/> |
| Spirulina,<br>Multicomponent             | <input type="checkbox"/>                                                                    | St. John's Wort                      | <input type="checkbox"/> | St. John's Wort,<br>Multicomponent | <input type="checkbox"/> |
| Tryptophan                               | <input type="checkbox"/>                                                                    | Vitamin B6                           | <input type="checkbox"/> | Vitamin B12                        | <input type="checkbox"/> |
| Vitamin C (With Or<br>Without Rose Hips) | <input type="checkbox"/>                                                                    | Vitamin D                            | <input type="checkbox"/> | Vitamin E                          | <input type="checkbox"/> |
| Vitamin E,<br>Multicomponent             | <input type="checkbox"/>                                                                    | Vitamins A & D                       | <input type="checkbox"/> | Yohimbe, Alone                     | <input type="checkbox"/> |
| Yohimbe,<br>Multicomponent               | <input type="checkbox"/>                                                                    | Zinc (Zinc<br>Gluconate)             | <input type="checkbox"/> | Others Specify<br>(.....)          | <input type="checkbox"/> |

|                  |                                                                                                                                                                                                                                                                                                                                                                                                                                                                                                                                                                                                                                                                                                                                                                                                                                                                                                                                                                                                                                                                                                                                                                                                                                                                                                                                           |
|------------------|-------------------------------------------------------------------------------------------------------------------------------------------------------------------------------------------------------------------------------------------------------------------------------------------------------------------------------------------------------------------------------------------------------------------------------------------------------------------------------------------------------------------------------------------------------------------------------------------------------------------------------------------------------------------------------------------------------------------------------------------------------------------------------------------------------------------------------------------------------------------------------------------------------------------------------------------------------------------------------------------------------------------------------------------------------------------------------------------------------------------------------------------------------------------------------------------------------------------------------------------------------------------------------------------------------------------------------------------|
| <p><b>9</b></p>  | <p><b>For what reason do/did you take health supplements?</b> <i>(you can choose more than one answer)</i></p> <p>           Body building <input type="checkbox"/>      Control aging <input type="checkbox"/>      Control anemia <input type="checkbox"/><br/>           Control blood pressure <input type="checkbox"/>      Control cholesterol level <input type="checkbox"/>      Detoxify <input type="checkbox"/><br/>           Digestive <input type="checkbox"/>      Energy booster <input type="checkbox"/>      Hormone therapy <input type="checkbox"/><br/>           Immune booster <input type="checkbox"/>      Improve overall health <input type="checkbox"/>      Insomnia <input type="checkbox"/><br/>           Memory improvement <input type="checkbox"/>      Menopausal <input type="checkbox"/>      Mental alertness <input type="checkbox"/><br/>           Mood alteration <input type="checkbox"/>      Organ health Specify (.....) <input type="checkbox"/>      Pregnancy <input type="checkbox"/><br/>           Prevent colds <input type="checkbox"/>      Prevent health problems Specify (.....) <input type="checkbox"/>      Supplement my diet <input type="checkbox"/><br/>           Weight management <input type="checkbox"/>      Others Specify (.....) <input type="checkbox"/> </p> |
| <p><b>10</b></p> | <p><b>Where do/did you purchase health supplement(s)?</b> <i>(you can choose more than one answer)</i></p> <p>           Pharmacy <input type="checkbox"/>    Clinic <input type="checkbox"/>    Gym <input type="checkbox"/>    Nutrition shops <input type="checkbox"/><br/>           Supermarket <input type="checkbox"/>    Other <input type="checkbox"/>    Specify (.....)         </p>                                                                                                                                                                                                                                                                                                                                                                                                                                                                                                                                                                                                                                                                                                                                                                                                                                                                                                                                           |
| <p><b>11</b></p> | <p><b>How many health supplement products have you ever used?</b></p> <p>           1-2 <input type="checkbox"/>      3-5 <input type="checkbox"/>      6-10 <input type="checkbox"/>      &gt;10 <input type="checkbox"/> </p>                                                                                                                                                                                                                                                                                                                                                                                                                                                                                                                                                                                                                                                                                                                                                                                                                                                                                                                                                                                                                                                                                                           |
| <p><b>12</b></p> | <p><b>Enter the full name of health supplement(s) you have used, including brand name.</b></p> <p>           Supplement name(s) (.....)<br/>           Don't know <input type="checkbox"/> </p>                                                                                                                                                                                                                                                                                                                                                                                                                                                                                                                                                                                                                                                                                                                                                                                                                                                                                                                                                                                                                                                                                                                                           |

| <b>Section D- Information about Health Supplement Products</b> |                                                                                                                                                                                                                                                                                                                                                                                                                                                                                                                   |
|----------------------------------------------------------------|-------------------------------------------------------------------------------------------------------------------------------------------------------------------------------------------------------------------------------------------------------------------------------------------------------------------------------------------------------------------------------------------------------------------------------------------------------------------------------------------------------------------|
| <b>1</b>                                                       | <b>Who advised you to take health supplements?</b> <i>(you can choose more than one answer)</i><br>Self-recommendation <input type="checkbox"/> Friends/Relative <input type="checkbox"/> Advertisements <input type="checkbox"/> Internet <input type="checkbox"/><br>By prescription <input type="checkbox"/> Health care personnel (nurse, etc.) <input type="checkbox"/> Other <input type="checkbox"/> Specify (.....)                                                                                       |
| <b>2</b>                                                       | <b>How many times have health supplements been prescribed for you by your health care practitioner?</b><br>Once <input type="checkbox"/> Twice <input type="checkbox"/> Several times <input type="checkbox"/><br>Never <input type="checkbox"/>                                                                                                                                                                                                                                                                  |
| <b>3</b>                                                       | <b>Where do you seek health supplements product information?</b> <i>(you can choose more than one answer)</i><br>Pharmacy <input type="checkbox"/> Physician <input type="checkbox"/> Producer helpline <input type="checkbox"/> Internet <input type="checkbox"/><br>Government call center <input type="checkbox"/> Relatives / Friends <input type="checkbox"/> Other <input type="checkbox"/> Specify (.....)                                                                                                 |
| <b>4</b>                                                       | <b>Do you find sufficient information on the label of health supplement products?</b><br>Very informative <input type="checkbox"/> Somewhat informative <input type="checkbox"/> Not informative <input type="checkbox"/><br>Don't read the label <input type="checkbox"/>                                                                                                                                                                                                                                        |
| <b>5</b>                                                       | <b>Do you think nutrition information on health supplement products is useful?</b><br>Yes <input type="checkbox"/> No <input type="checkbox"/>                                                                                                                                                                                                                                                                                                                                                                    |
| <b>6</b>                                                       | <b>Which label information concerns you?</b> <i>(you can choose more than one answer)</i><br>Ingredients <input type="checkbox"/> Indication <input type="checkbox"/> Prescribed dosages <input type="checkbox"/> Adverse reactions <input type="checkbox"/> Product durability <input type="checkbox"/><br>Dietary sources of nutrients <input type="checkbox"/> Claims <input type="checkbox"/> Precautions <input type="checkbox"/> Dosing instructions <input type="checkbox"/> None <input type="checkbox"/> |
| <b>7</b>                                                       | <b>Do you follow recommended label information?</b><br>Always <input type="checkbox"/> Often <input type="checkbox"/> Sometimes <input type="checkbox"/> Never <input type="checkbox"/>                                                                                                                                                                                                                                                                                                                           |

| <b>Section E- Adverse Events Related to Health Supplement Consumption</b> |                                                                                                                                                                                                                                                                                                                                                                                                                                                                                                                                                                                                                                                                                                                                                                                                                                                                                                                                                                                                                                                                    |
|---------------------------------------------------------------------------|--------------------------------------------------------------------------------------------------------------------------------------------------------------------------------------------------------------------------------------------------------------------------------------------------------------------------------------------------------------------------------------------------------------------------------------------------------------------------------------------------------------------------------------------------------------------------------------------------------------------------------------------------------------------------------------------------------------------------------------------------------------------------------------------------------------------------------------------------------------------------------------------------------------------------------------------------------------------------------------------------------------------------------------------------------------------|
| <b>1</b>                                                                  | <b>Have you ever experienced any adverse event related to health supplement use?</b> <i>(if no, please proceed to the last question of the questionnaire)</i><br>Yes <input type="checkbox"/> No <input type="checkbox"/>                                                                                                                                                                                                                                                                                                                                                                                                                                                                                                                                                                                                                                                                                                                                                                                                                                          |
| <b>2</b>                                                                  | <b>Which adverse event of health supplement use have you ever experienced?</b> <i>(you can choose more than one answer)</i><br>Abdominal pain <input type="checkbox"/> Anorexia <input type="checkbox"/> Anxiety <input type="checkbox"/> Chest pain <input type="checkbox"/> Convulsions <input type="checkbox"/><br>Dermatitis <input type="checkbox"/> Diarrhea <input type="checkbox"/> Dizziness <input type="checkbox"/> Dyspnea <input type="checkbox"/> Edema <input type="checkbox"/><br>Fatigue <input type="checkbox"/> Hair loss <input type="checkbox"/> Headache <input type="checkbox"/> Hypertension <input type="checkbox"/> Hypotension <input type="checkbox"/><br>Muscle cramping <input type="checkbox"/> Muscle pain <input type="checkbox"/> Nausea <input type="checkbox"/> Palpitations <input type="checkbox"/> Pyrexia <input type="checkbox"/><br>Sedation <input type="checkbox"/> Tingling <input type="checkbox"/> Urticaria <input type="checkbox"/> Vomiting <input type="checkbox"/> Other <input type="checkbox"/> Specify..... |
| <b>3</b>                                                                  | <b>What was the severity of the adverse events?</b> <i>(you can choose more than one answer)</i><br>Mild <input type="checkbox"/> Moderate <input type="checkbox"/> Severe <input type="checkbox"/> Life-threatening <input type="checkbox"/>                                                                                                                                                                                                                                                                                                                                                                                                                                                                                                                                                                                                                                                                                                                                                                                                                      |

|           |                                                                                                                                                                                                                                                                                                                                                                                                                                                                                                                                         |
|-----------|-----------------------------------------------------------------------------------------------------------------------------------------------------------------------------------------------------------------------------------------------------------------------------------------------------------------------------------------------------------------------------------------------------------------------------------------------------------------------------------------------------------------------------------------|
| <b>4</b>  | <b>How frequently have you encountered adverse events due to health supplement consumption?</b><br><br>Once <input type="checkbox"/> Occasionally <input type="checkbox"/> Frequently <input type="checkbox"/>                                                                                                                                                                                                                                                                                                                          |
| <b>5</b>  | <b>What was the onset time of adverse events after consuming health supplement?</b> <i>(you can choose more than one answer)</i><br>Less than 1 hour <input type="checkbox"/> 1 hour to 1 day <input type="checkbox"/> More than 1 day <input type="checkbox"/>                                                                                                                                                                                                                                                                         |
| <b>6</b>  | <b>How was the relation between health supplement consumption and the adverse event confirmed?</b> <i>(you can choose more than one answer)</i><br>Discontinued use ceased the effect <input type="checkbox"/> Not confirmed/personal opinion <input type="checkbox"/><br>Physician opinion <input type="checkbox"/> Medical diagnosis without lab confirmation <input type="checkbox"/><br>Clinical test <input type="checkbox"/>                                                                                                      |
| <b>7</b>  | <b>Which of the health supplement(s) you have used was suspected/confirmed to cause the adverse event(s)?</b><br>Supplement name(s) (.....)                      Don't know <input type="checkbox"/>                                                                                                                                                                                                                                                                                                                                    |
| <b>8</b>  | <b>When visiting your health care practitioner for any reason, has he/she ever asked you about your health supplement consumption?</b><br>Yes <input type="checkbox"/> No <input type="checkbox"/>                                                                                                                                                                                                                                                                                                                                      |
| <b>9</b>  | <b>How did the adverse event(s) resolve?</b> <i>(you can choose more than one answer) (if you answered any but not "Hospitalization", please proceed to question F1)</i><br>Discontinued use by personal decision <input type="checkbox"/> Discontinued use by medical advice <input type="checkbox"/><br>Medical treatment <input type="checkbox"/> Hospitalization <input type="checkbox"/> Resolved spontaneously <input type="checkbox"/><br>Still persists <input type="checkbox"/> Other <input type="checkbox"/> Specify (.....) |
| <b>10</b> | <b>How long have you been hospitalized due to the adverse event(s)?</b> <i>(you can choose more than one answer)</i><br>Less than a day <input type="checkbox"/> Few days <input type="checkbox"/> More than a week <input type="checkbox"/>                                                                                                                                                                                                                                                                                            |

|                                            |                                                                                                                                                                                                                                                                                                                                                                                                                                                          |
|--------------------------------------------|----------------------------------------------------------------------------------------------------------------------------------------------------------------------------------------------------------------------------------------------------------------------------------------------------------------------------------------------------------------------------------------------------------------------------------------------------------|
| <b>Section F- Reporting Adverse Events</b> |                                                                                                                                                                                                                                                                                                                                                                                                                                                          |
| <b>1</b>                                   | <b>Have you ever informed your physician about your health supplement consumption?</b><br>Yes <input type="checkbox"/> No <input type="checkbox"/>                                                                                                                                                                                                                                                                                                       |
| <b>2</b>                                   | <b>Have you ever reported an adverse event related to health supplement consumption?</b> <i>(if no, please proceed to the last question of the questionnaire)</i><br>Yes <input type="checkbox"/> No <input type="checkbox"/>                                                                                                                                                                                                                            |
| <b>3</b>                                   | <b>Where did you report the adverse event(s)?</b> <i>(you can choose more than one answer)</i><br>Pharmacy <input type="checkbox"/> Physician <input type="checkbox"/> Producer helpline <input type="checkbox"/> Internet <input type="checkbox"/> Government call center <input type="checkbox"/><br>Hospital <input type="checkbox"/> Clinic <input type="checkbox"/> Police <input type="checkbox"/> Others <input type="checkbox"/> Specify (.....) |
| <b>4</b>                                   | <b>What do you think about the establishment of a surveillance system of adverse events related to health supplement consumption?</b><br>Definitely beneficial <input type="checkbox"/> Somewhat beneficial <input type="checkbox"/> Not sure <input type="checkbox"/> Not beneficial <input type="checkbox"/><br>Definitely not beneficial <input type="checkbox"/>                                                                                     |
